# Supplementary material for: Positive Autism Screening Rates in Toddlers Born During the COVID-19 Pandemic
Source: PubMed Central journal article supplement (PMC11420691; doi:10.1001/jamanetworkopen.2024.35005), 2024-09-23
Supplement: jamanetwopen-e2435005-s002.pdf [file jamanetwopen-e2435005-s002.pdf]

## Data Sharing Statement

Firestein. Positive Modified Checklist for Autism in Toddlers-Revised Screening Rates in Pandemic-Born Children. *JAMA Netw Open*. Published September 23, 2024.

doi:10.1001/jamanetworkopen.2024.35005

### Data

**Data available:** No

### Additional Information

**Explanation for why data not available:** Data contains HIPAA protected information.
